# Supplementary material for: Development and validation of a nomogram risk prediction model for malignancy in dermatomyositis patients: a retrospective study
Source: PeerJ. 2021 Dec 9;9:e12626. doi: 10.7717/peerj.12626 (PMC8667746; doi:10.7717/peerj.12626)
Supplement: Supplemental Information 3 — Clinical and laboratory data on dermatomyositis patients in the training cohort and the validation cohort. The data were used for statistical analysis. [file peerj-09-12626-s003.xlsx]

## Sheet: training cohort
No.	Year of admission	Malignant tumor	Age	Age>50	Sex	interstitial pneumonia	respiration failure	Dysphagia	Gottron's sign	Periungual erythema	Poikiloderma	Refractory itching	V-neck sign	Periorbital erythema	Raynaud's phenomenon	Joint pain	Proximal muscle weakness	ANA	Anti-Jo-1	CA125(U/ml)≥35	CA19-9(U/ml)≥37	CK(U/L)≥198	LDH(U/L)≥300
1	2015	1	61	1	1	0	0	1	0	0	1	0	0	1	0	0	0	0	0	0		1	1
2	2013	0	76	1	1	1	0	0	1	0	0	1	1	1	0	0	0	1	0	0	0	1	1
3	2011	0	54	1	0	0	0	0	0	1	1	0	0	1	0	0	1	0	0	0	0	0	1
4	2011	0	46	0	0	1	0	1	1	0	0	0	1	1	0	0	1	1	0	0	0	0	1
5	2010	0	12	0	1	0	0	0	1	0	1	0	0	1	0	0	1	0	0	0	0	0	1
6	2006	0	31	0	0	0	0	1	0	0	1	0	0	1	0	1	1	1	0	0	0	0	0
7	2003	0	25	0	1	0	0	0	0	0	0	0	0	0	0	0	1	0	0	0	0	0	0
8	2012	0	16	0	0	0	0	0	1	0	0	0	1	0	0	0	0	0	0	0	0	0	0
9	2004	0	52	1	0	1	0	0	1	0	0	0	0	1	0	0	1	0	0	0	0	0	1
10	2004	0	52	1	0	1	0	0	0	0	1	0	0	0	0	0	0	0	0	0	0	0	1
11	2006	0	39	0	0	0	0	1	1	0	0	0	1	0	0	1	1	0	0	0	0	0	0
12	2011	1	36	0	0	0	0	1	0	0	0	1	1	0	0	0	1	0	0	0	0	0	1
13	2013	0	69	1	1	1	0	0	1	0	0	1	1	0	0	0	1	0	0	0	0	0	0
14	2014	0	41	0	0	1	0	0	1	0	0	0	0	1	0	0	1	0	0	0	0	0	0
15	2015	0	39	0	1	1	0	0	1	0	0	0	1	0	1	0	1	1	0	0	0	0	0
16	2005	0	48	0	1	0	0	0	0	0	0	0	1	1	0	0	0	1	0	0	0	1	0
17	2013	0	58	1	0	1	0	1	1	0	0	0	1	1	0	0	1	0	0	0	0	0	1
18	2015	0	47	0	0	1	0	0	1	1	0	1	0	1	0	0	1	1	0	0	0	1	0
19	2006	0	58	1	0	1	0	0	1	0	1	0	0	0	0	0	0	0	0	0	0	1	1
20	2014	0	51	1	0	0	0	0	0	0	0	0	1	0	0	0	0	1	0	0	0	0	0
21	2014	1	70	1	1	0	1	0	0	0	1	0	0	1	0	0	1	0	0	0	0	0	0
22	2005	0	13	0	1	0	0	0	0	0	0	1	0	0	0	1	0	0	0	0	0	1	1
23	2005	0	16	0	0	0	0	0	1	1	1	0	0	1	0	0	1	0	0	0	0	0	1
24	2013	0	62	1	0	1	0	1	1	1	1	0	1	1	0	0	1	0	0	1	0	0	0
25	2009	1	74	1	1	0	0	1	0	0	1	1	0	1	0	0	0	1	0	0	0	1	0
26	2007	0	51	1	0	1	0	0	0	0	0	0	0	0	0	0	0	0	0	0	0	0	1
27	2004	0	65	1	0	0	0	0	0	0	1	0	1	1	0	0	0	0	0	0	0	0	0
28	2009	0	17	0	1	0	0	1	1	0	0	0	1	1	0	0	1	1	0	0	0	0	1
29	2009	0	57	1	0	1	0	0	1	0	1	0	0	0	1	1	0	1	1	1	0	0	0
30	2015	0	50	1	0	1	0	0	1	0	1	0	1	0	0	0	1	1	0	0	0	1	1
31	2015	0	70	1	1	0	0	0	1	0	1	0	0	1	0	0	1	1	0	0	0	0	0
32	2011	0	40	0	1	1	1	0	1	0	1	0	0	1	0	1	1	0	0	0	0	1	1
33	2015	1	40	0	1	0	0	1	0	1	1	0	1	0	0	0	0	0	0	0	0	0	0
34	2013	0	43	0	0	0	0	1	0	0	0	0	0	1	0	0	1	1	0	0	0	1	0
35	2004	1	43	0	1	0	0	1	0	0	0	0	0	0	0	0	0	1	0	0	0	0	0
36	2011	0	42	0	1	0	0	1	1	0	1	0	1	0	0	0	1	1	0	0	0	1	1
37	2013	0	17	0	1	1	0	0	1	0	0	0	0	1	1	0	1	1	0	0	0	0	1
38	2006	1	66	1	1	1	0	0	0	0	1	0	1	1	0	0	1	0	0	0	0	0	0
39	2015	1	15	0	0	0	0	0	1	0	1	0	1	1	0	0	1	1	0	0	0	1	1
40	2012	0	50	1	0	1	0	0	0	0	0	0	1	0	0	0	1	1	0	1	0	1	1
41	2013	0	7	0	0	0	0	0	1	0	1	1	0	1	0	0	1	1	0	0	0	0	1
42	2014	1	56	1	1	0	0	0	1	0	1	0	1	0	0	0	1	1	0	0	0	1	1
43	2015	0	52	1	0	1	0	0	0	0	0	0	1	1	0	0	1	1	0	1	0	0	1
44	2014	0	69	1	0	0	0	0	1	0	1	0	0	1	0	0	0	1	0	0	0	1	1
45	2014	0	37	0	1	1	0	0	1	0	0	0	1	1	1	0	0	1	0	0	1	0	1
46	2015	0	43	0	0	1	0	0	1	1	0	1	0	1	0	0	0	1	0	0	0	0	1
47	2013	0	2	0	1	0	0	0	0	0	0	0	0	1	0	0	1	1	0	0	0	0	1
48	2012	1	65	1	1	0	0	0	1	0	0	0	0	1	0	0	1	1	0	0	1	0	1
49	2010	1	65	1	0	1	0	0	0	0	1	0	0	1	0	0	1	0	0	0	0	0	0
50	2012	0	41	0	0	0	0	1	1	0	1	0	0	1	0	0	1	1	0	0	1	0	1
51	2012	0	56	1	0	1	0	0	0	0	0	0	0	1	0	0	1	0	0	0	1	0	1
52	2012	0	61	1	0	0	0	0	1	0	1	0	1	1	0	0	1	1	0	0	1	0	1
53	2014	0	58	1	1	1	0	1	1	0	0	0	0	1	0	0	1	1	0	0	0	0	0
54	2012	1	82	1	0	1	0	1	1	0	1	0	1	0	0	0	1	0	0	0	0	1	0
55	2012	1	76	1	0	0	0	1	1	0	0	0	1	0	0	0	1	1	0	0	1	1	1
56	2014	0	47	0	0	0	0	0	1	0	1	0	1	1	0	0	1	1	0	0	0	0	1
57	2015	0	37	0	0	1	0	0	1	0	0	0	1	0	0	0	0	1	0	0	0	0	1
58	2008	0	36	0	0	0	0	0	0	0	1	0	1	0	0	0	1	0	0	0	0	1	1
59	2015	0	32	0	0	0	0	0	0	0	1	0	1	1	0	0	0	1	0	0	0	1	1
60	2012	0	52	1	1	1	1	1	0	1	1	0	1	0	1	0	1	1	0	0	0	0	1
61	2014	0	39	0	0	1	1	0	1	0	0	0	1	0	0	0	1	1	0	0	0	0	1
62	2012	0	45	0	1	1	0	0	1	0	1	0	0	0	0	0	0	1	0	0	0	0	1
63	2015	0	5	0	0	0	0	0	0	0	1	0	0	1	0	0	1	0	0	0	0	0	0
64	2013	0	73	1	0	1	0	0	0	0	1	0	0	0	0	0	1	0	0	0	0	1	1
65	2012	0	43	0	1	1	0	1	0	0	1	0	0	0	0	0	1	1	0	0	0	1	1
66	2012	0	81	1	0	1	0	0	1	0	1	0	1	0	0	0	1	0	0	0	0	0	0
67	2013	0	2	0	1	0	0	0	1	0	0	1	1	1	0	0	1	0	0	0	0	0	1
68	2015	0	58	1	1	0	0	0	1	0	0	1	0	1	0	0	1	0	0	0	0	0	0
69	2012	0	8	0	0	0	0	0	0	0	1	0	0	1	0	0	1	1	0	0	0	0	1
70	2014	1	42	0	0	0	0	1	0	0	1	0	0	1	0	0	1	0	0	0	0	1	1
71	2014	0	56	1	1	1	0	0	0	0	1	0	1	1	0	0	1	0	0	0	0	0	1
72	2013	0	49	0	0	1	0	0	0	0	1	0	0	1	0	0	1	1	0	0	0	1	0
73	2012	0	48	0	0	0	0	0	0	0	1	0	1	1	0	0	1	1	0	0	0	1	1
74	2013	1	63	1	1	0	0	0	1	1	0	0	1	0	0	0	1	1	0	0	0	1	0
75	2014	0	74	1	0	0	0	0	1	0	1	0	1	1	0	0	1	1	0	0	0	0	0
76	2012	1	34	0	0	0	0	0	1	0	1	0	0	1	0	0	1	1	0	0	1	0	0
77	2013	0	5	0	1	0	0	0	1	0	1	0	0	0	0	0	0	0	0	0	0	0	1
78	2015	1	48	0	0	1	0	0	0	0	1	0	1	1	0	0	0	1	0	0	0	0	0
79	2015	0	23	0	0	0	0	0	0	0	1	0	0	1	0	0	1	1	0	0	1	0	0
80	2013	0	66	1	1	1	0	0	1	0	0	0	1	1	0	0	1	1	0	0	0	0	0
81	2013	1	45	0	1	1	0	1	0	0	1	1	1	0	0	0	1	1	0	0	1	1	1
82	2012	0	18	0	0	0	0	0	0	0	1	0	0	0	1	0	1	1	0	0	0	1	1
83	2007	0	60	1	1	1	0	0	0	1	1	0	1	0	1	0	0	1	0	1	0	0	1
84	2013	1	76	1	0	1	0	1	0	0	0	0	1	1	0	0	1	0	0	0	0	1	1
85	2011	0	52	1	1	1	0	0	0	0	0	0	0	0	0	0	1	1	1	0	0	1	1
86	2005	0	73	1	0	0	0	0	1	0	1	1	1	1	0	0	1	1	0	1	0	0	0
87	2010	1	59	1	0	1	1	0	0	0	1	0	1	1	0	0	0	0	0	0	0	0	1
88	2006	0	72	1	0	1	1	0	0	0	1	0	1	0	0	0	1	1	0	0	0	0	1
89	2011	0	54	1	1	1	0	0	1	0	1	0	0	0	0	0	1	0	0	0	0	1	1
90	2003	0	72	1	1	1	0	0	1	0	1	0	1	0	1	0	0	1	0	1	0	0	0
91	2005	1	59	1	1	0	0	0	1	0	1	0	0	1	0	0	0	1	0	1	1	1	0
92	2006	0	46	0	0	0	0	0	0	0	1	0	0	1	0	0	0	1	0	0	0	0	0
93	2015	0	65	1	0	1	0	0	0	0	1	0	0	1	0	0	1	1	0	0	0	1	1
94	2004	0	44	0	1	0	0	0	1	0	1	0	0	1	0	0	0	1	0	0	0	0	0
95	2013	0	58	1	0	1	0	0	1	1	1	0	1	1	0	0	1	1	0	0	0	0	1
96	2011	0	62	1	0	0	0	1	0	0	1	0	0	1	0	0	1	1	0	1	1	1	1
97	2013	0	57	1	1	0	0	0	0	1	1	0	0	1	0	0	0	0	0	0	0	1	1
98	2014	0	50	1	0	1	1	0	0	1	1	0	0	0	0	1	0	0	0	0	0	1	1
99	2015	0	59	1	0	1	0	0	0	0	1	0	0	1	0	0	1	1	0	0	0	0	1
100	2012	1	34	0	0	1	0	0	0	1	1	1	1	1	0	1	1	0	0	0	0	1	1
101	2013	0	42	0	0	0	0	1	0	0	1	0	0	1	0	0	1	0	0	0	1	1	1
102	2013	0	76	1	1	0	0	0	1	1	0	0	1	1	0	0	0	1	0	0	0	0	0
103	2012	0	43	0	1	1	1	0	1	0	0	1	0	1	0	0	1	0	0	0	0	0	0
104	2013	0	44	0	0	1	1	1	0	1	1	0	0	0	0	1	0	1	0	0	0	0	1
105	2015	0	50	1	0	1	1	0	1	0	1	0	0	1	0	0	0	1	0	0	0	0	1
106	2012	0	37	0	1	1	1	0	1	0	1	0	0	0	0	1	0	1	0	0	0	1	1
107	2015	0	45	0	0	1	1	0	1	0	1	0	1	0	0	1	0	1	0	0	0	0	0
108	2014	0	40	0	0	1	1	0	1	0	1	0	0	1	0	1	1	1	1	0	0	1	1
109	2015	0	44	0	0	0	0	0	1	0	1	1	1	1	0	1	1	1	1	0	0	0	1
110	2013	0	8	0	0	0	0	0	0	0	1	0	1	1	0	0	1	1	0	0	0	0	1
111	2015	1	55	1	1	0	0	1	0	0	1	1	0	1	0	0	1	1	0	0	0	0	0
112	2013	0	33	0	0	0	0	0	1	0	1	0	1	1	0	0	0	1	0	0	0	0	1
113	2012	0	61	1	1	0	0	1	0	0	0	0	0	0	0	0	1	0	0	0	0	1	1
114	2008	1	56	1	0	0	0	1	0	0	1	0	0	1	0	0	0	1	0	0	1	1	1
115	2013	0	40	0	0	0	0	0	1	0	1	0	1	1	0	0	1	1	0	0	0	1	1
116	2015	0	52	1	0	1	1	0	1	0	1	0	0	1	0	1	1	1	0	0	0	1	0
117	2005	1	30	0	0	0	0	0	1	0	1	1	0	1	0	1	0	0	0	1	1	1	0
118	2013	0	46	0	0	0	0	0	1	0	1	0	1	1	0	0	1	0	0	0	0	1	0
119	2010	0	1.5	0	0	0	0	0	1	0	0	0	0	1	0	0	1	1	0	0	0	1	1
120	2013	0	61	1	0	0	1	0	0	0	0	0	1	1	0	1	1	1	0	0	0	0	1
121	2012	0	54	1	0	1	1	1	0	0	1	0	0	0	0	0	1	1	0	0	0	0	1
122	2013	0	56	1	1	1	1	0	0	0	1	0	0	0	0	1	1	1	0	0	0	0	1
123	2013	1	59	1	1	0	0	0	0	0	1	1	1	0	0	0	0	1	0	0	0	1	1
124	2011	0	64	1	0	0	0	0	1	0	0	0	0	1	0	0	0	1	0	0	1	0	0
125	2009	1	52	1	1	0	0	1	1	1	1	0	0	1	0	0	1	1	0	0	1	1	1
126	2008	0	60	1	1	0	0	0	0	1	0	0	1	1	0	0	1	1	0	1	0	0	0
127	2015	0	24	0	1	0	0	0	0	0	1	0	0	1	0	0	1	0	0	0	0	1	1
128	2009	1	49	0	0	0	0	1	0	0	1	0	0	1	0	0	1	1	0	0	0	1	1
129	2015	0	57	1	0	1	1	0	1	1	1	0	0	1	0	1	0	1	0	0	1	0	0
130	2011	1	67	1	0	0	0	1	1	0	1	0	1	1	0	0	1	0	0	0	0	1	1
131	2007	0	42	0	0	0	0	0	0	0	1	0	0	1	0	1	0	0	0	0	0	0	1
132	2004	1	69	1	1	0	0	0	1	1	1	1	0	1	0	0	1	0	0	0	0	0	1
133	2015	1	50	1	0	0	0	0	1	0	1	0	1	1	0	0	1	1	0	0	0	1	0
134	2009	1	55	1	0	0	0	0	1	0	1	0	0	1	0	0	0	0	0	0	0	0	1
135	2004	0	58	1	0	1	1	0	1	0	1	0	0	1	0	0	1	0	0	0	0	0	0
136	2008	0	68	1	0	0	0	0	1	0	1	0	0	1	0	0	1	1	0	0	0	1	1
137	2002	1	64	1	0	1	1	0	0	0	1	0	0	1	0	1	1	1	0	1	0	1	1
138	2012	1	75	1	0	1	1	1	1	0	1	0	1	1	0	0	1	1	0	1	1	1	1
139	2014	0	12	0	1	0	0	0	0	0	1	0	0	0	0	0	0	0	0	0	0	1	1
140	2011	0	52	1	0	0	0	0	0	0	1	0	0	1	0	0	1	0	0	0	0	1	1
141	2014	0	42	0	0	0	0	0	0	0	0	0	1	1	0	0	1	1	0	0	0	0	0
142	2015	0	61	1	0	1	1	0	0	0	1	0	1	1	0	0	0	1	0	0	0	0	0
143	2015	1	30	0	1	1	1	0	0	0	1	0	0	0	0	0	0	0	0	0	0	1	1
144	2014	1	54	1	1	0	0	0	0	0	0	0	0	0	0	0	1	0	0	0	0	0	0
145	2012	0	46	0	0	0	0	1	0	0	1	0	0	1	0	0	1	1	0	0	0	1	1
146	2014	0	28	0	0	0	0	0	0	0	1	0	0	1	0	1	1	1	0	0	0	0	0
147	2013	0	80	1	1	1	1	0	0	0	1	0	0	1	0	0	1	0	0	0	0	0	0
148	2014	1	42	0	0	0	0	0	1	0	1	0	1	1	0	0	0	1	0	0	0	0	0
149	2014	1	64	1	0	0	0	0	0	0	1	0	0	1	0	0	1	0	0	0	0	1	1
150	2014	0	41	0	1	0	0	0	0	0	1	0	1	1	0	0	0	1	0	0	0	0	0
151	2012	0	41	0	1	0	1	0	0	0	1	0	0	0	0	0	1	0	0	0	0	0	0
152	2015	1	60	1	1	0	0	1	0	0	1	1	0	1	0	0	1	1	0	0	0	1	1
153	2014	0	66	1	1	1	1	0	1	0	1	0	0	1	0	0	1	1	0	0	0	0	1
154	2014	0	51	1	0	0	0	0	0	0	1	0	1	1	0	1	1	1	0	0	0	0	0
155	2014	0	49	0	0	0	0	0	1	0	1	0	1	1	0	0	0	1	0	0	0	1	1
156	2014	0	47	0	0	0	0	1	0	0	1	0	1	1	0	0	1	0	0	0	0	0	0
157	2014	1	8	0	1	0	0	0	1	0	1	1	0	1	0	0	1	0	0	0	0	1	1
158	2015	0	30	0	1	1	1	0	1	0	1	0	1	1	0	0	1	1	0	0	0	1	1
159	2014	0	22	0	1	0	0	0	1	0	1	0	0	1	0	0	1	0	0	0	1	0	0
160	2015	0	48	0	0	0	0	0	0	0	1	0	0	0	0	0	1	0	0	0	0	1	1
161	2014	0	41	0	0	0	0	0	1	0	1	0	0	1	0	1	1	1	0	0	0	1	0
162	2013	0	7	0	0	0	0	0	1	0	1	0	0	0	0	0	1	0	0	0	0	0	0
163	2006	0	64	1	0	1	1	0	0	0	1	0	0	0	0	0	1	1	0	1	0	0	1
164	2013	0	61	1	1	1	1	0	0	0	1	0	1	1	0	1	1	1	0	0	1	1	1
165	2015	1	61	1	1	1	0	1	0	0	1	0	0	0	0	0	1	1	0	0	0	1	0
166	2012	1	65	1	1	0	0	0	1	0	1	0	0	1	0	0	1	1	0	0	0	0	1
167	2012	0	83	1	0	1	1	0	1	0	1	0	0	0	0	0	1	0	0	0	0	1	1
168	2016	0	73	1	0	1	0	0	0	0	1	0	0	0	0	0	1	0	0	1	1	0	0

## Sheet: validation cohort
No.	Year of admission	Malignant tumor	Age	Age>50	Sex	interstitial pneumonia	respiration failure	Dysphagia	Gottron's sign	Periungual erythema	Poikiloderma	Refractory itching	V-neck sign	Periorbital erythema	Raynaud's phenomenon	Joint pain	Proximal muscle weakness	ANA	Anti-Jo-1	CA125(U/ml)≥35	CA19-9(U/ml)≥37	CK(U/L)≥198	LDH(U/L)≥300
1	2019	0	56	1	0	1	0	0	0	0	0	0	0	0	0	0	1	1	1	0	0	1	1
2	2016	0	22	0	1	1	0	0	0	0	0	0	1	1	1	0	0	0	0	0	0	0	0
3	2016	0	22	0	1	0	0	0	1	0	0	0	1	1	1	0	1	0	0	0	0	0	0
4	2017	0	44	0	1	1	0	0	1	0	1	0	0	0	0	0	1	0	0	0	0	0	1
5	2017	1	55	1	1	1	1	0	1	0	0	0	1	0	0	0	1	1	0	0	0	1	1
6	2016	0	52	1	0	1	1	0	1	1	0	0	0	1	0	0	1	1	0	0	0	0	1
7	2019	0	5	0	1	0	0	0	1	0	0	1	0	0	0	0	0	0	0	0	0	0	1
8	2017	0	39	0	0	1	0	0	0	0	0	0	0	0	0	0	1	1	1	0	0	1	1
9	2017	0	33	0	0	1	0	0	1	0	1	0	1	0	0	0	1	1	0	0	0	0	0
10	2016	0	67	1	0	1	0	0	0	0	0	0	0	0	0	0	1	1	1	0	0	0	1
11	2016	0	62	1	1	1	0	1	1	0	0	0	1	1	0	0	0	1	0	0	0	0	1
12	2019	0	57	1	0	0	0	0	1	1	0	0	1	1	0	0	1	0	0	0	0	0	0
13	2017	0	44	0	0	0	0	0	1	0	0	0	1	0	0	0	1	0	0	0	0	0	1
14	2017	0	3	0	1	0	0	0	1	0	1	0	0	1	0	0	0	1	0	0	0	0	0
15	2017	0	40	0	0	1	0	0	0	0	0	0	0	0	0	0	1	1	1	0	0	0	0
16	2017	0	56	1	0	0	0	1	1	0	0	0	1	1		0	0	1	0	0	0	0	0
17	2016	1	68	1	0	0	0	1	0	0	0	0	1	1	0	0	1	1	0	0	0	0	1
18	2017	1	61	1	0	0	0	0	1	0	0	1	1	0	0	0	0	0	0	0	0	0	1
19	2017	1	64	1	0	0	0	0	0	0	0	0	1	1	0	0	1	0	0	0	0	0	1
20	2017	0	6	0	0	0	0	0	1	0	0	0	0	1	0	0	1	1	0	0	0	0	0
21	2017	0	50	1	1	1	0	0	1	1	0	0	1	0	0	0	0	1	0	0	0	0	0
22	2017	0	47	0	1	1	0	0	1	1	0	0	1	1	0	0	1	1	0	0	0	0	0
23	2016	1	58	1	1	0	0	0	0	0	0	0	0	0	0	0	1	0	0	1	0	0	0
24	2018	0	57	1	0	1	0	0	1	0	0	1	1	0	0	0	0	0	0	0	0	0	1
25	2016	0	42	0	0	0	0	1	1	0	0	0	0	1	1	0	1	1	0	1	0	0	0
26	2016	0	44	0	0	0	0	0	1	0	0	0	1	0	0	0	1	1	0	0	0	0	0
27	2017	0	36	0	0	1	0	1	1	0	0	0	0	1	0	0	1	1	0	0	0	0	1
28	2019	0	53	1	0	1	0	1	1	0	1	0	0	1	0	0	1	1	0	0	1	0	1
29	2016	0	54	1	0	1	0	0	1	0	0	0	0	0	0	0	1	1	0	0	0	0	0
30	2016	0	19	0	0	0	0	1	0	0	0	0	0	1	0	0	1	1	0	0	0	1	1
31	2016	1	38	0	0	0	0	0	1	0	0	0	1	1	0	0	0	0	0	0	0	0	0
32	2019	0	42	0	1	1	0	0	1	0	0	0	0	0	0	0	1	1	1	0	0	0	0
33	2017	0	32	0	1	0	0	0	1	1	0	0	0	0	0	0	0	1	0	0	0	0	1
34	2017	1	48	0	0	1	0	1	0	1	1	0	1	1	0	0	1	1	0	0	0	0	0
35	2018	0	17	0	1	0	0	0	0	0	1	0	0	1	0	0	1	0	0	0	0	0	0
36	2017	0	58	1	0	1	1	1	1	0	0	0	0	1	0	0	0	1	0	0	0	0	1
37	2016	0	48	0	0	1	0	0	1	1	0	0	0	0	0	0	1	1	0	0	0	1	1
38	2016	0	37	0	0	1	0	0	1	0	0	0	0	0	0	1	1	0	0	0	0	1	1
39	2016	0	42	0	1	0	0	0	1	0	0	0	1	1	0	0	0	0	0	0	0	1	1
40	2017	0	33	0	0	0	0	0	0	0	0	0	0	0	0	0	1	1	0	0	0	1	0
41	2018	0	22	0	1	1	1	0	0	0	0	0	0	0	0	0	1	0	0	0	0	0	0
42	2016	1	50	1	1	0	0	0	0	0	0	0	1	1	0	0	1	0	0	0	0	1	0
43	2017	0	44	0	0	1	1	0	0	0	0	0	0	0	0	1	1	1	0	0	0	0	0
44	2017	0	30	0	1	0	0	0	0	0	0	0	0	0	0	1	1	0	0	0	0	1	0
45	2016	0	51	1	1	1	1	1	0	0	0	0	0	1	0	0	1	0	0	0	1	1	1
46	2017	0	3	0	0	0	0	0	1	0	0	1	0	1	0	1	0	1	0	0	0	0	1
47	2019	0	56	1	0	1	1	0	0	0	0	0	1	1	0	0	0	1	0	0	0	1	1
48	2017	0	64	1	0	1	1	1	1	0	0	0	0	1	0	1	0	0	0	0	1	0	1
49	2017	0	53	1	0	0	0	0	1	0	0	0	1	1	0	0	0	1	0	0	0	0	0
50	2017	0	50	1	1	0	0	0	1	0	0	1	1	1	0	0	0	1	0	0	0	0	0
51	2016	0	68	1	1	0	0	0	0	0	1	0	1	1	0	1	0	1	0	1	0	0	0
52	2016	1	59	1	0	0	0	0	0	0	1	1	0	0	0	1	1	1	0	0	0	1	0
53	2017	0	59	1	1	1	1	0	0	0	0	0	0	0	0	1	0	1	1	0	0	0	0
54	2017	0	43	0	0	0	0	1	0	0	1	1	1	0	0	0	1	1	1	0	0	1	1
55	2017	0	59	1	0	1	1	0	0	0	0	1	0	0	0	0	1	1	0	0	0	0	1
56	2016	0	60	1	0	1	1	0	0	0	0	0	0	1	0	1	1	1	0	0	0	0	0
57	2016	0	57	1	1	0	0	0	0	0	0	1	1	1	0	0	0	0	0	0	0	0	0
58	2016	1	61	1	1	0	0	0	1	0	0	0	0	1	0	0	0	1	0	0	0	0	0
59	2017	0	3	0	1	0	0	0	1	0	0	0	0	1	0	0	1	0	0	0	0	1	1
60	2017	0	43	0	1	1	1	0	1	1	0	1	1	0	0	1	1	1	0	0	0	1	1
61	2016	0	48	0	0	0	0	0	0	0	1	0	1	1	0	0	1	1	0	0	0	0	1
62	2017	0	48	0	0	0	1	1	1	0	0	0	0	1	0	1	1	1	0	0	0	1	1
63	2016	1	54	1	1	0	0	1	1	1	0	0	1	1	0	0	1	0	0	0	0	0	1
64	2017	0	26	0	0	1	1	0	0	0	0	0	0	0	0	0	1	1	0	0	0	0	1
65	2017	0	45	0	1	1	1	0	1	0	0	0	0	1	0	1	1	0	0	0	0	1	0
66	2016	0	45	0	0	1	1	1	0	0	0	0	0	1	0	0	1	0	0	0	0	0	0
67	2017	0	44	0	0	0	0	0	1	0	0	1	0	1	0	0	0	0	0	0	0	0	0
68	2019	0	42	0	0	1	1	0	1	0	0	0	1	1	1	1	1	0	0	0	0	0	1
69	2016	0	53	1	0	1	1	0	1	0	0	0	1	1	0	0	1	0	0	0	1	0	0
70	2016	1	74	1	1	0	0	0	1	0	0	0	1	1	0	0	1	1	0	0	1	1	1
71	2017	0	22	0	0	0	0	0	1	0	0	0	0	1	0	1	1	1	0	0	0	1	1
72	2017	0	52	1	0	0	0	0	0	0	0	0	0	0	0	0	1	1	1	1	0	0	0
